# Supplementary material
Source: PubMed Central journal article supplement (PMC5548408)
Supplement: NIHMS880591-supplement-supplement_1.pdf [file NIHMS880591-supplement-supplement_1.pdf]

**Supplementary Table 1: Demographic and Clinical Characteristics of Groups Determined with Latent Class Analysis**

|                               | <b>Intact</b>   | <b>Amnesic</b>  | <b>Mixed impairment</b> | <b>Significance test</b>     | <b>Group comparisons</b>                                                    |
|-------------------------------|-----------------|-----------------|-------------------------|------------------------------|-----------------------------------------------------------------------------|
| <b>Age</b>                    | 70.21 (7.16)    | 70.39 (8.13)    | 71.54 (6.72)            | F(2,196) = 0.34, ns          | N/a                                                                         |
| <b>Education</b>              | 16.35 (2.26)    | 16.06 (2.50)    | 16.42 (2.40)            | F(2,196) = 0.37, ns          | N/a                                                                         |
| <b>Sex (% male)</b>           | 59.6%           | 78.1%           | 69.2%                   | $\chi^2(2) = 6.30, p = 0.04$ | Amnesic > intact, p = 0.01                                                  |
| <b>Disease Duration</b>       | 5.98 (4.08)     | 7.11 (5.86)     | 8.85 (6.55)             | F(2,196) = 3.63, p = 0.02    | Mixed > intact, p = 0.02                                                    |
| <b>Hoehn &amp; Yahr</b>       | 2.20 (0.53)     | 2.53 (0.62)     | 2.56 (0.91)             | F(2,192) = 7.47, p = 0.001   | Amnesic > intact, p < 0.01<br>Mixed impairment > intact, p = 0.03           |
| <b>UPDRS-III</b>              | 20.57 (10.70)   | 24.80 (11.65)   | 26.12 (12.03)           | F(2,193) = 4.25, p = 0.02    | Amnesic > intact, p = 0.01<br>Mixed impairment > intact, p = 0.06           |
| <b>PD subtype (% PIGD)</b>    | 57.0%           | 65.6%           | 88.5%                   | $\chi^2(2) = 7.81, p = 0.02$ | Mixed impairment > intact, p = 0.01<br>Mixed impairment > amnesic, p = 0.06 |
| <b>LEDD</b>                   | 739.52 (491.11) | 717.41 (409.26) | 937.79 (575.31)         | F(2, 196) = 2.15, ns         | N/a                                                                         |
| <b>GDS-15</b>                 | 2.31 (2.17)     | 3.14 (3.14)     | 3.12 (3.68)             | F(2,195) = 2.19, ns          | N/a                                                                         |
| <b>DRS-2</b>                  | 138.97 (4.41)   | 134.44 (5.34)   | 134.15 (6.06)           | F(2,196) = 21.43, p < 0.001  | Amnesic < intact, p < 0.001<br>Mixed impairment < intact, p < 0.001         |
| <b>ADCS-ADL IADL Subscale</b> | 52.51 (4.72)    | 49.10 (7.52)    | 47.60 (10.34)           | F(2,144) = 6.40, p = 0.002   | Amnesic < intact, p = 0.01<br>Mixed impairment < intact, p = 0.02           |

Results are presented as M (SD) except where noted (i.e., sex and PD subtype). Ns = not significant; UPDRS-III = Unified Parkinson's Disease Rating Scale Part III; PIGD = postural instability/gait disturbance-dominant; LEDD = levodopa-equivalent daily dose; GDS-15 = Geriatric Depression Scale-15; DRS-2 = Dementia Rating Scale-2; ADCS-ADL = Alzheimer's Disease Cooperative Study Activities of Daily Living Inventory; IADL = Instrumental activities of daily living.
